# Supplementary material for: Metagenomic Analysis Revealed Differences in Composition and Function Between Liquid-Associated and Solid-Associated Microorganisms of Sheep Rumen
Source: PubMed Central journal article supplement (PMC9197192; doi:10.3389/fmicb.2022.851567), 2022-05-27

# PCoA - PC1 vs PC2

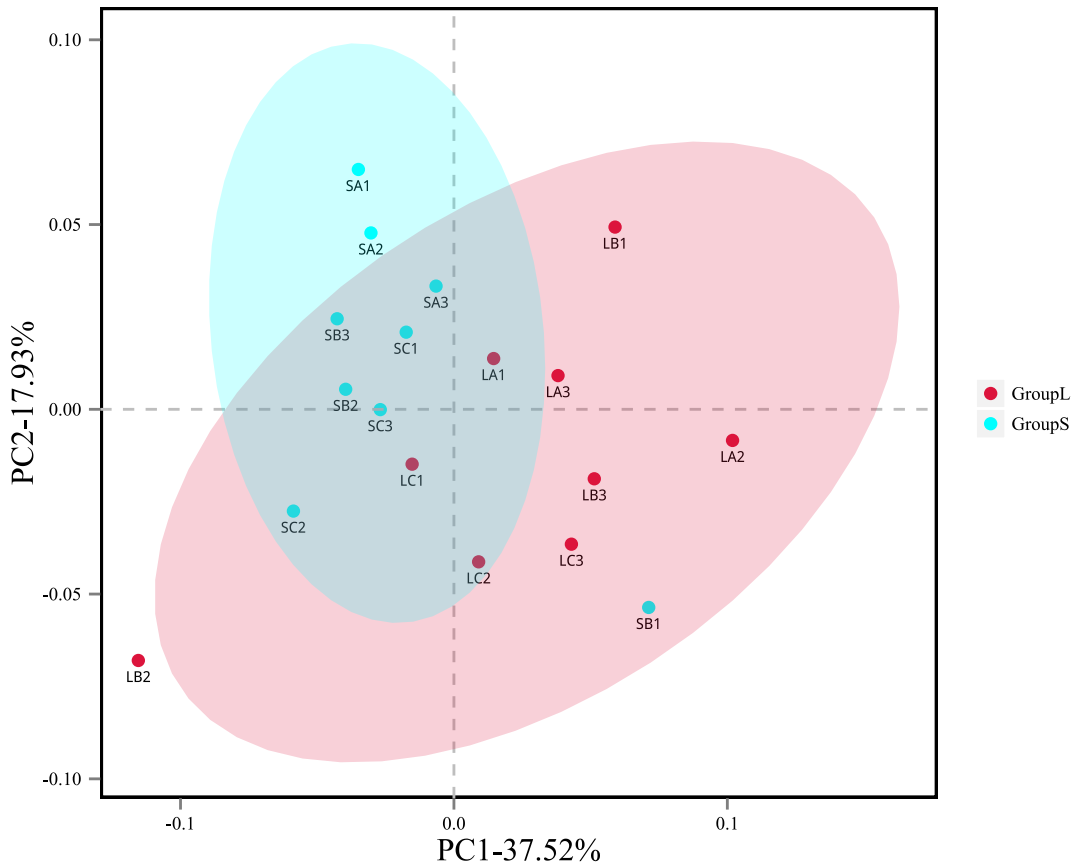

Supplement: Image_3.pdf [file Image_3.pdf]
