# Supplementary material for: Metagenomic Analysis Revealed Differences in Composition and Function Between Liquid-Associated and Solid-Associated Microorganisms of Sheep Rumen
Source: PubMed Central journal article supplement (PMC9197192; doi:10.3389/fmicb.2022.851567), 2022-05-27
Supplement: Image_4.pdf [file Image_4.pdf]

## Carbohydrate-Active enzymes

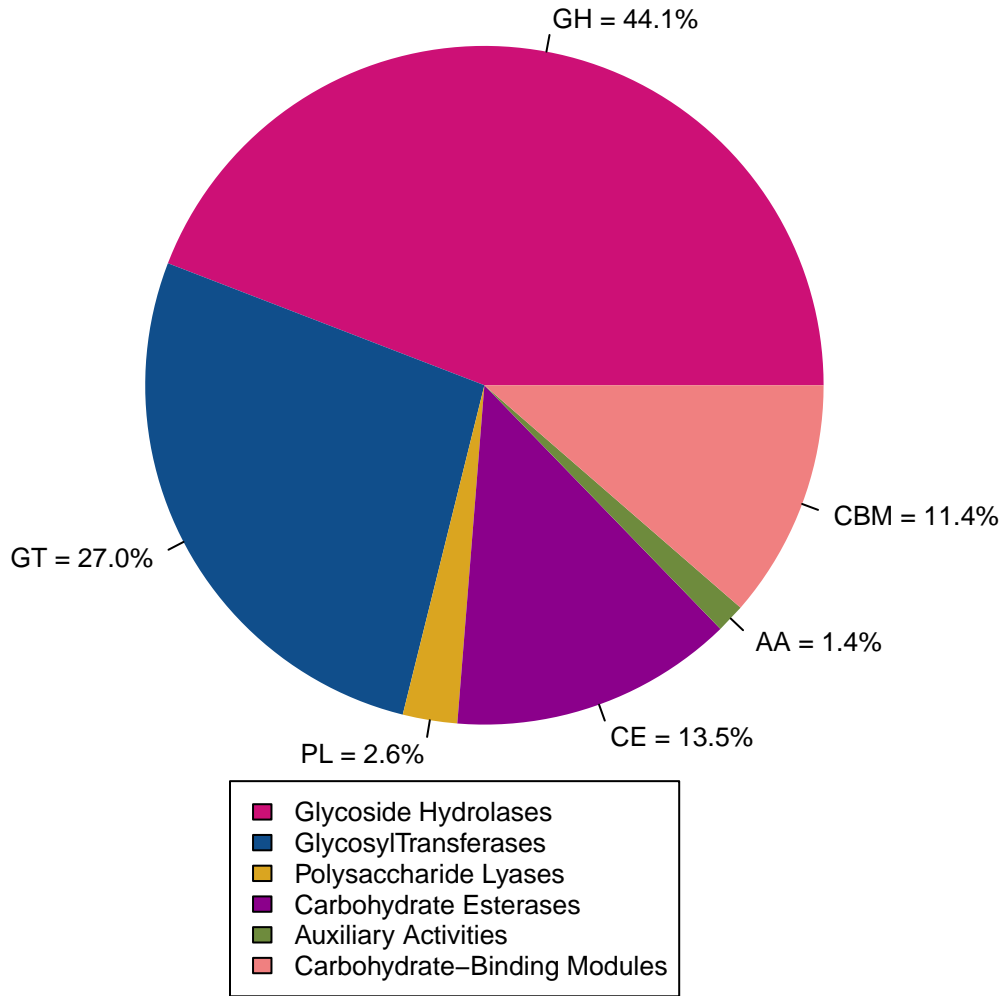

Supplementary Figure 4. Diagram of carbohydrate enzyme distribution in all samples. (n=18)
