# Supplementary material for: Metagenomic Analysis Revealed Differences in Composition and Function Between Liquid-Associated and Solid-Associated Microorganisms of Sheep Rumen
Source: PubMed Central journal article supplement (PMC9197192; doi:10.3389/fmicb.2022.851567), 2022-05-27
Supplement: Image_5.pdf [file Image_5.pdf]

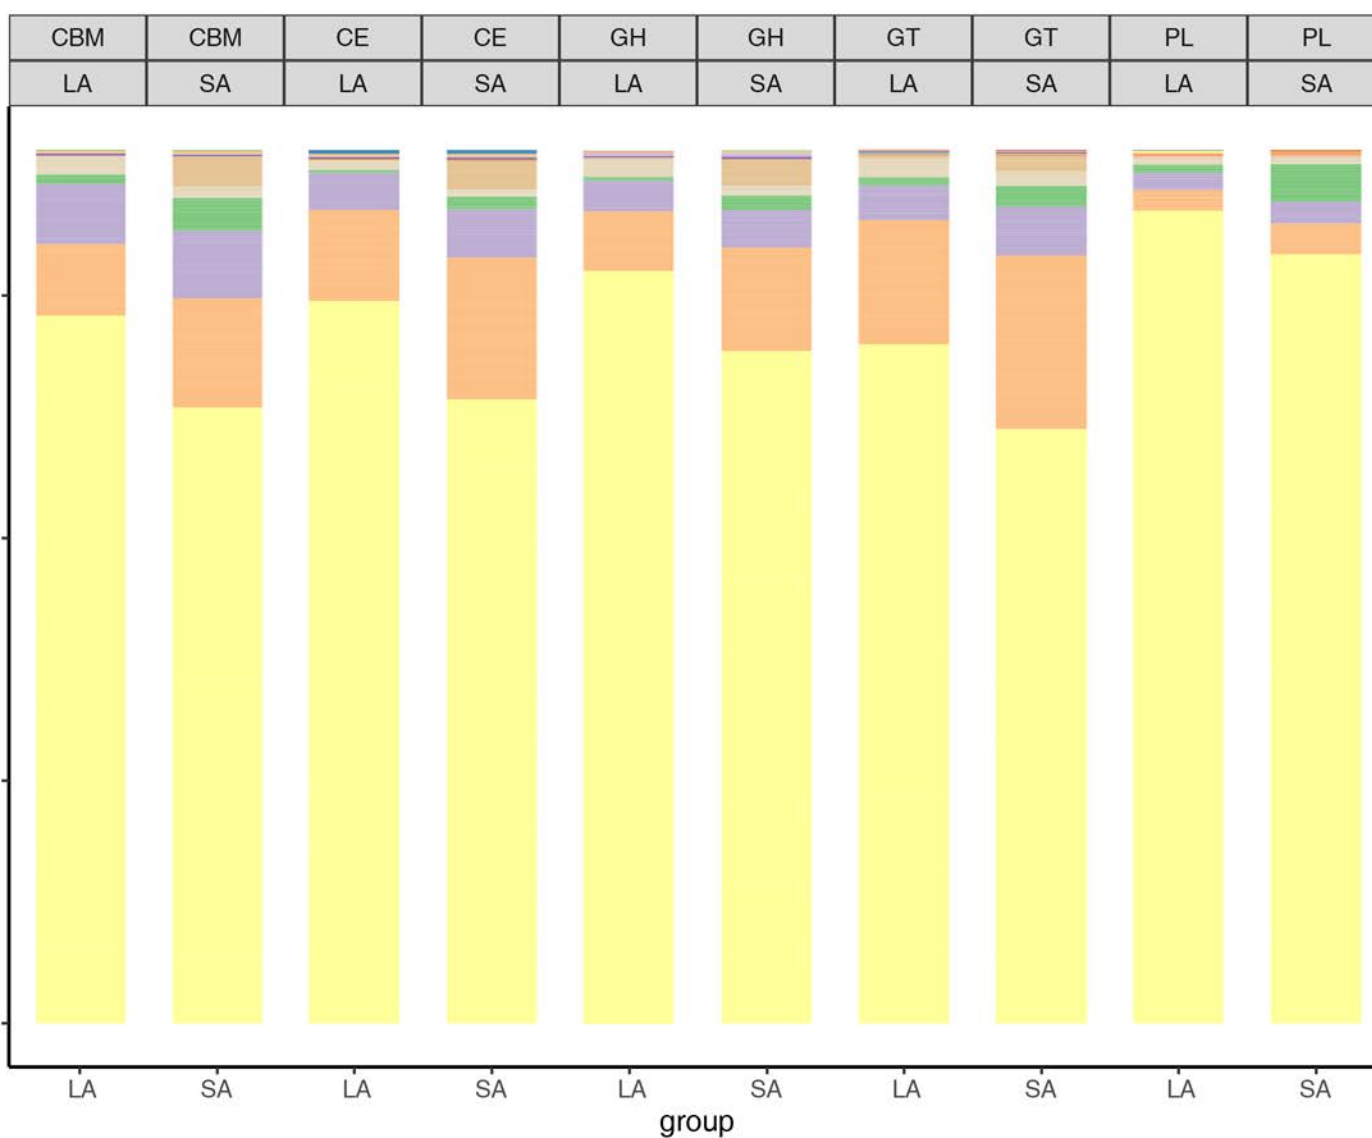

### Phylum

- Basidiomycota
- Chytridiomycota
- Lentisphaerae
- Candidatus\_Saccharibacteria
- Ascomycota
- Chlamydiae
- Actinobacteria
- Verrucomicrobia
- Unassigned
- Tenericutes
- Candidatus\_Microgenomates
- Planctomycetes
- Candidatus\_Melainabacteria
- Euryarchaeota
- Spirochaetes
- Proteobacteria
- Fibrobacteres
- Others
- Firmicutes
- Bacteroidetes
