# Supplementary material for: Metagenomic Analysis Revealed Differences in Composition and Function Between Liquid-Associated and Solid-Associated Microorganisms of Sheep Rumen
Source: PubMed Central journal article supplement (PMC9197192; doi:10.3389/fmicb.2022.851567), 2022-05-27
Supplement: Image_7.pdf [file Image_7.pdf]

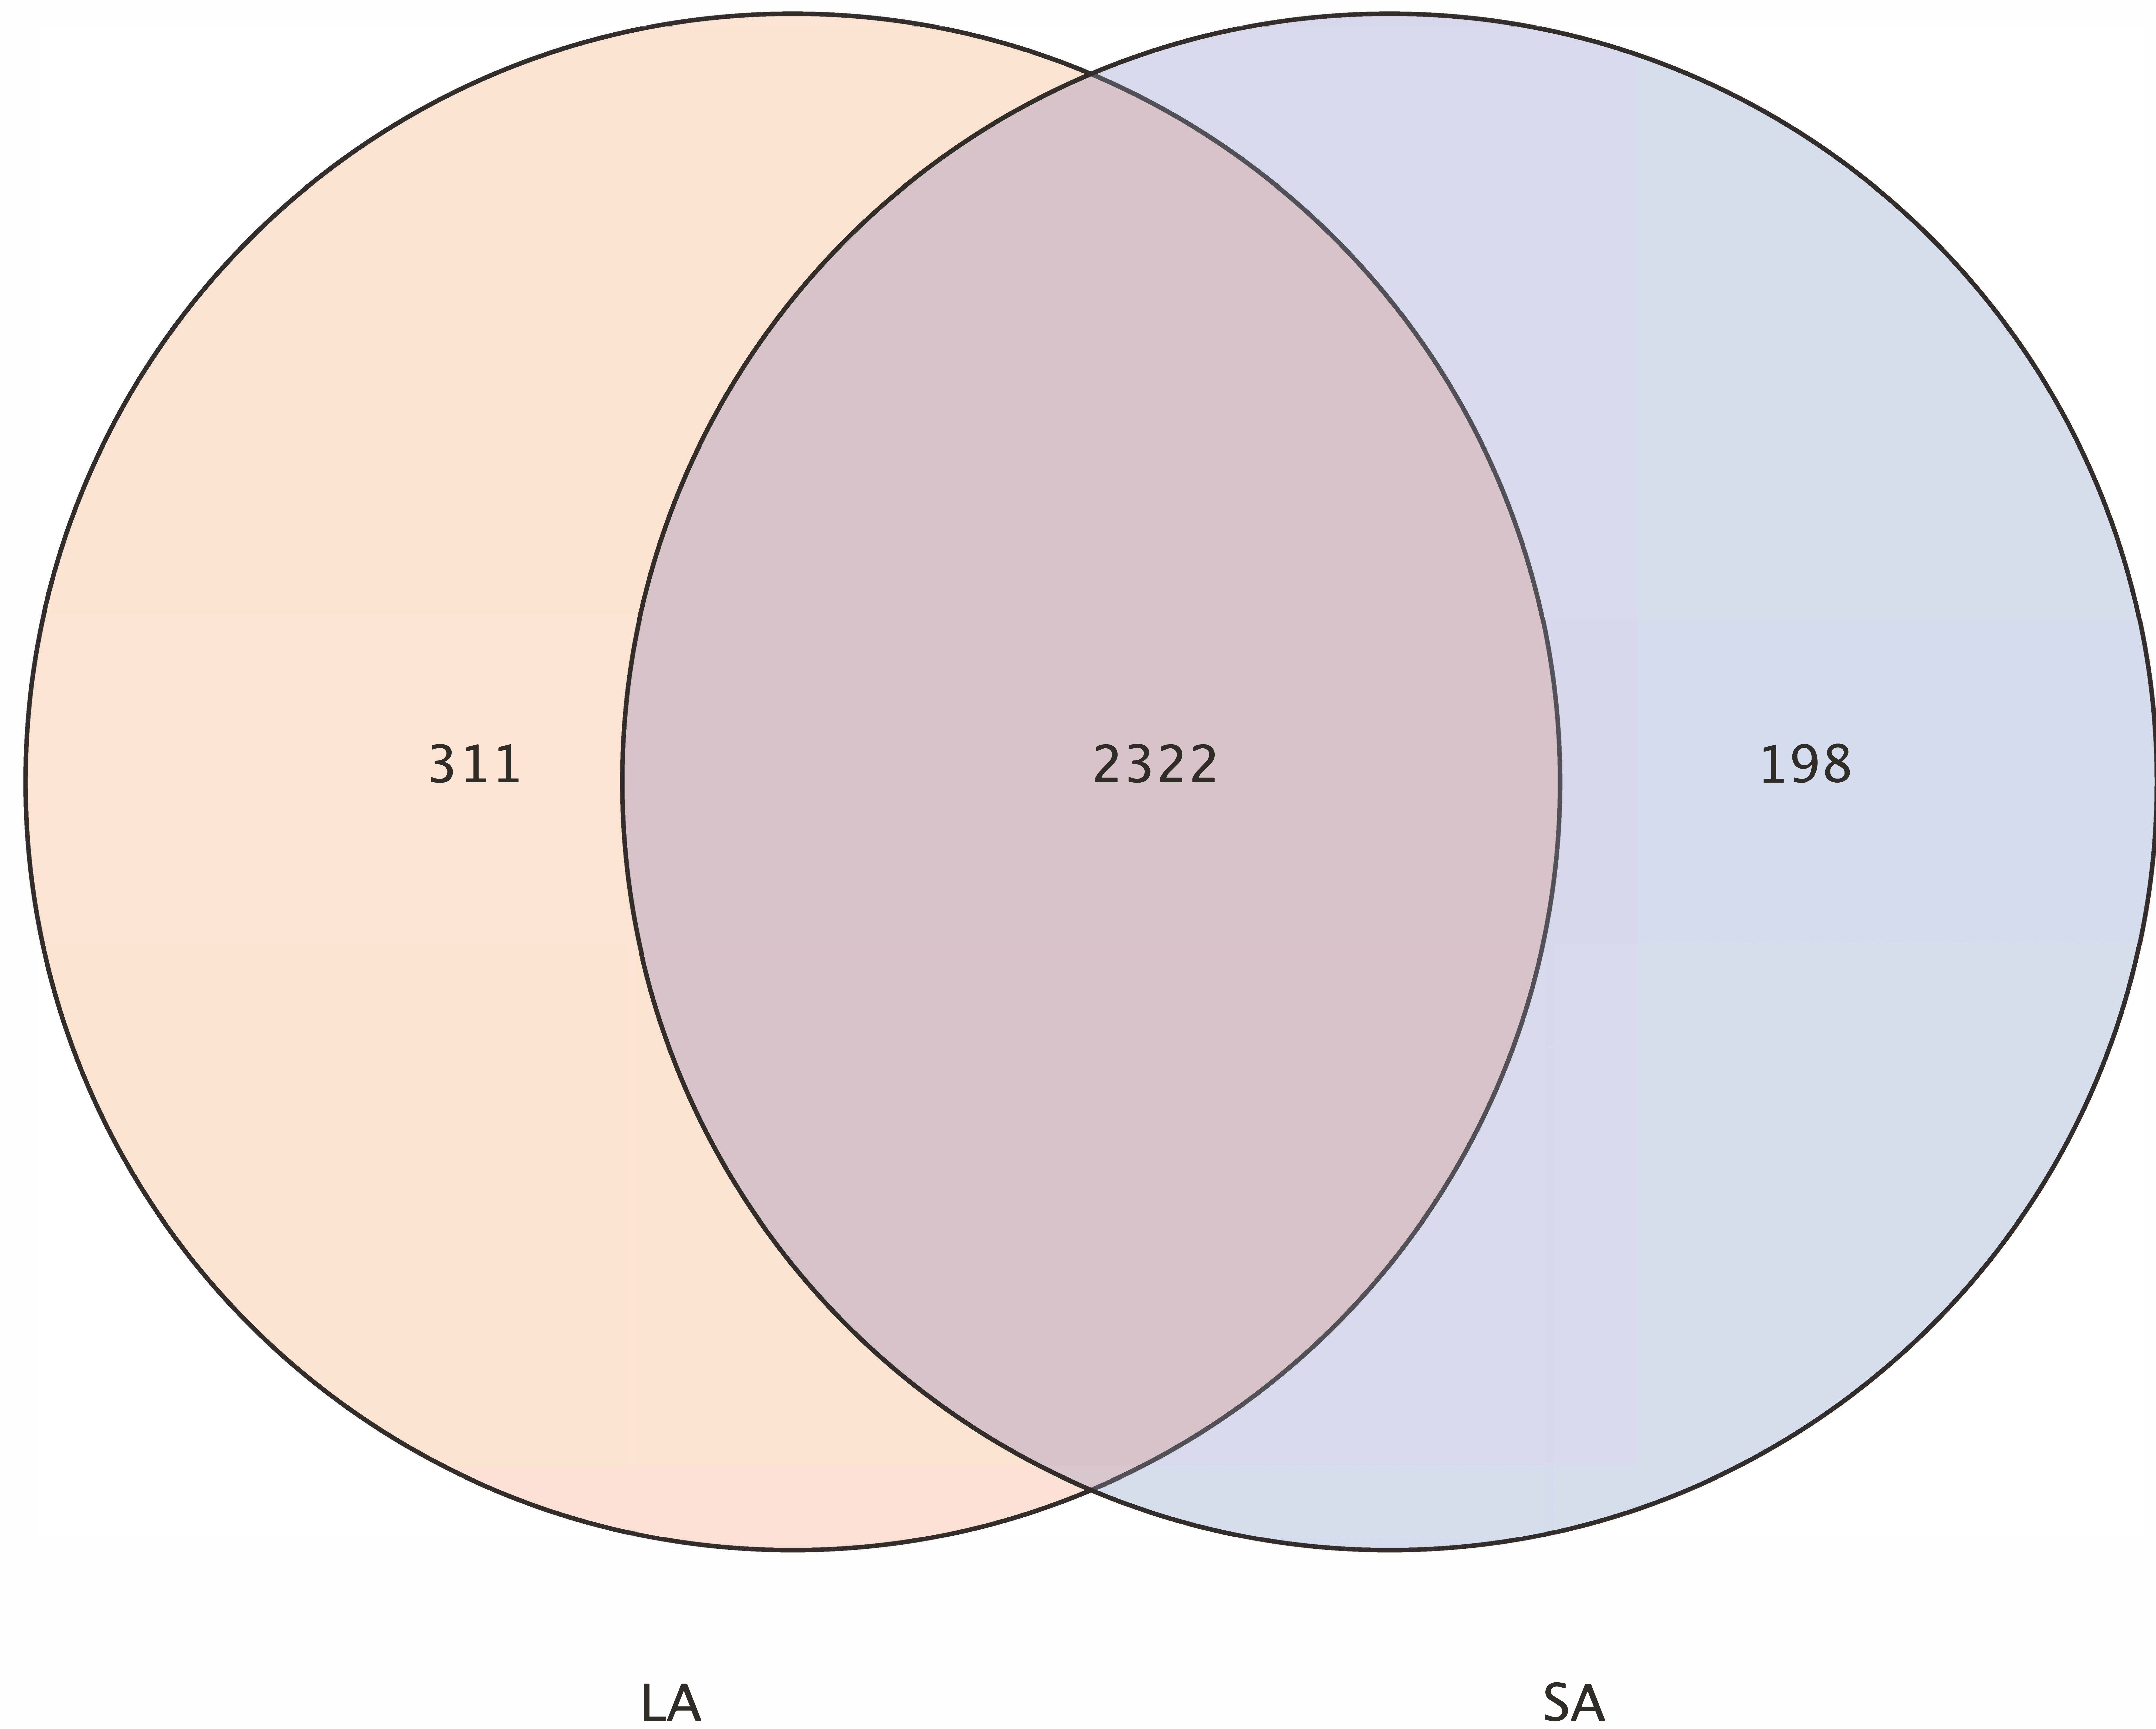

**Supplementary Figure 7.** Venn diagram of microbial composition of SA and LA systems at genus level.
