# Supplementary material for: Metagenomic Analysis Revealed Differences in Composition and Function Between Liquid-Associated and Solid-Associated Microorganisms of Sheep Rumen
Source: Front Microbiol. 2022 May 27;13:851567. doi: 10.3389/fmicb.2022.851567 (PMC9197192; doi:10.3389/fmicb.2022.851567)
Supplement: Supplementary Table 1 — Summary statistics of sample assembly results. [file Table_1.xlsx]

## Sheet: Supplementary Table 1
Supplementary Table 1. Summary statistics of sample assembly results
Sample	Contig Num.	Total Len.(bp)	Largest Len.(bp)	N50(bp)	GC(%)	Mapped(%)
LA1	217123	275808639	256885	2585	47.76	96.51
LA2	145636	164477012	274024	1954	47.92	97.53
LA3	335110	360738865	398089	1765	47.78	94.45
LB1	237239	261304655	373505	1833	47.33	96.46
LB2	527158	517770964	203685	1338	42.63	93.82
LB3	156423	205970183	190554	2811	48.89	97.36
LC1	222095	274590866	398062	2437	46.87	96.48
LC2	224746	269400023	328822	2326	47.41	96.43
LC3	283552	302098186	256731	1724	47.73	95.22
SA1	307265	388341397	394761	2761	47.18	94.98
SA2	324677	407816865	629793	2647	48.4	95.06
SA3	446647	515979727	398089	1976	47.79	94.08
SB1	182132	213346433	256771	2127	48.23	96.93
SB2	307310	385901264	398062	2430	47.03	96.59
SB3	545840	582362188	256758	1643	47.83	93.44
SC1	290212	372582111	378739	2847	48.19	95.82
SC2	266998	352748019	400995	2789	46.34	95.98
SC3	350978	416989036	256885	2115	47.24	94.47

## Sheet: Supplementary Table 2
Supplementary Table 2. Summary statistics of sample genetic prediction results
Sample ID	Gene number	Total length(bp)	Average(bp)	Max length(bp)	Min length(bp)
LA1	383542	239893857	625	26355	102
LA2	238486	142370145	596	18573	102
LA3	540522	316803360	586	25164	102
LB1	386769	229998243	594	25851	102
LB2	782503	454817514	581	24756	102
LB3	280836	178489686	635	21768	102
LC1	386977	238021428	615	19380	102
LC2	382967	233256705	609	20835	102
LC3	451822	261436590	578	18573	102
SA1	545305	345069606	632	38583	102
SA2	570690	362199015	634	25377	102
SA3	748603	454553340	607	25164	102
SB1	306828	185206614	603	18573	102
SB2	541156	336623226	622	20844	102
SB3	876467	511012845	583	18711	102
SC1	514385	327646731	636	26355	102
SC2	484707	307707675	634	37230	102
SC3	596732	364183965	610	20835	102

## Sheet: Supplementary Table 3
Supplementary Table 3. Comparison of taxonomy and relative abundance between LA and SA systems.
Item	LA	SA	SEM
Taxonomy
Phylum	114.55	122.77	3.61
Class	107.11	109.55	3.81
Order	207.55	210	8.29
Family	431.33	430.66	19.14
Genus	1525.9	1608	61.11
species	7002.2	7897.7	324.16
relative abundance
Phylum	0.8192	0.8321	0.05
Class	0.8015	0.8073	0.02
Order	0.799	0.804	0.02
Family	0.7345	0.7351	0.01
Genus	0.693687	0.672925	0.079
species	0.574594	0.602138	0.028

## Sheet: Supplementary Table 4
Supplementary Table 4. Effects of LA and SA systems on relative abundances of KO terms in ruminal microbiome (up/down means upregulation/downregulation in SA with comparison to LA).
Item	KO	GroupLA(10-4)	GroupL(Sem)	GroupSA(10-4)	GroupS(Sem)	log2（SA/LA)	FDR	state
1	K01990	10.0714	6.88e-05	14.8181	0.000102662	0.5571	0.03888	up
2	K01153	8.9268	2.37e-05	10.2908	2.12e-05	0.2051	0.02574	up
3	K06180	7.6982	2.24e-05	8.715	1.87e-05	0.179	0.05577	up
4	K02529	5.4822	3.34e-05	6.5842	1.42e-05	0.2642	0.09304	up
5	K08303	5.9154	1.9e-05	6.5734	5.55e-06	0.1522	0.06667	up
6	K01915	5.1236	2.24e-05	6.5527	3.95e-05	0.3549	0.08002	up
7	K03574	5.1782	2.99e-05	6.3387	2.05e-05	0.2917	0.07507	up
8	K03497	4.7092	2.79e-05	5.8873	2.45e-05	0.3221	0.07711	up
9	K00527	5.0229	1.87e-05	5.6931	1.07e-05	0.1807	0.0838	up
10	K02337	4.2678	1.31e-05	4.9426	1.24e-05	0.2118	0.04125	up
11	K02030	3.4981	2.16e-05	4.7887	2.47e-05	0.4531	0.03563	up
12	K04759	3.616	1.06e-05	4.7123	1.72e-05	0.382	0.04395	up
13	K01104	4.0077	1.45e-05	4.6451	1.46e-05	0.2129	0.08439	up
14	K02469	4.0032	6.93e-06	4.631	1.49e-05	0.2102	0.039	up
15	K02470	3.8135	9.33e-06	4.6013	1.37e-05	0.2709	0.01833	up
16	K03043	3.9079	8.02e-06	4.5378	1.33e-05	0.2156	0.03226	up
17	K00764	3.4706	1.2e-05	4.3855	2.39e-05	0.3376	0.06032	up
18	K03924	3.2853	8.46e-06	4.2512	2.28e-05	0.3719	0.03425	up
19	K02335	3.7447	8.74e-06	4.2324	1.31e-05	0.1766	0.08366	up
20	K01872	3.4702	1.12e-05	4.2084	1.06e-05	0.2783	0.01894	up
21	K03498	3.3534	1.01e-05	4.1984	1.27e-05	0.3242	0.02391	up
22	K02358	3.4901	7.85e-06	4.1833	1.17e-05	0.2614	0.02005	up
23	K01874	3.5917	1.02e-05	4.16	1.02e-05	0.2119	0.03519	up
24	K03466	3.6441	1.23e-05	4.0907	5.01e-06	0.1668	0.06331	up
25	K01448	3.6421	8.4e-06	4.0893	1.16e-05	0.1671	0.08244	up
26	K01869	3.5276	8.3e-06	4.0836	1.17e-05	0.2112	0.03749	up
27	K06223	6.0451	6.03e-05	4.003	3.01e-05	-0.5947	0.09346	down
28	K01952	3.3347	1.16e-05	3.9858	1.51e-05	0.2573	0.06027	up
29	K03499	3.2322	1.47e-05	3.9577	9.91e-06	0.2922	0.03012	up
30	K03555	3.4686	6.39e-06	3.9483	1.33e-05	0.1869	0.07325	up
31	K03070	3.3816	8.75e-06	3.9164	9.63e-06	0.2118	0.02965	up
32	K12410	3.4253	1.28e-05	3.902	8.5e-06	0.188	0.08378	up
33	K03671	3.2619	1.25e-05	3.8886	1.3e-05	0.2535	0.05586	up
34	K01870	3.4034	1.04e-05	3.8838	1.07e-05	0.1905	0.07445	up
35	K02519	3.3457	7.76e-06	3.8655	7.04e-06	0.2083	0.01978	up
36	K03544	3.3371	1.27e-05	3.8609	1.03e-05	0.2104	0.07529	up
37	K03495	3.3854	7.01e-06	3.8592	6.02e-06	0.189	0.02116	up
38	K03076	3.4174	9.2e-06	3.8572	7.48e-06	0.1747	0.04381	up
39	K03723	3.3198	5.7e-06	3.8466	1.11e-05	0.2125	0.02668	up
40	K09458	2.9498	1.29e-05	3.8429	1.15e-05	0.3816	0.02232	up
41	K02029	2.708	1.45e-05	3.8336	1.66e-05	0.5015	0.02118	up
42	K06969	3.1472	1.16e-05	3.8193	1.07e-05	0.2792	0.02549	up
43	K00789	3.3545	8.03e-06	3.8083	1.11e-05	0.1831	0.06807	up
44	K07056	3.0256	1.2e-05	3.8067	1.31e-05	0.3313	0.02388	up
45	K03569	3.3455	1.35e-05	3.795	5.36e-06	0.1819	0.08405	up
46	K02601	3.1951	9.87e-06	3.7938	1.03e-05	0.2478	0.02745	up
47	K02313	3.205	1.14e-05	3.7832	1.11e-05	0.2393	0.04772	up
48	K01873	3.2141	6.17e-06	3.7787	1.09e-05	0.2335	0.02309	up
49	K03703	3.3989	8.32e-06	3.7674	5.49e-06	0.1485	0.04384	up
50	K02931	3.316	1.18e-05	3.7419	7.07e-06	0.1743	0.08384	up
51	K01951	3.1024	7.65e-06	3.7399	1.94e-05	0.2696	0.08869	up
52	K03545	3.1802	1.07e-05	3.7376	9.86e-06	0.233	0.03906	up
53	K01885	3.2045	5.33e-06	3.7293	9.8e-06	0.2188	0.0188	up
54	K03215	3.2377	1.21e-05	3.7257	7.44e-06	0.2025	0.05963	up
55	K01876	3.3193	1.1e-05	3.7227	5.33e-06	0.1655	0.06815	up
56	K03217	3.1189	8.52e-06	3.7205	7.12e-06	0.2545	0.03962	up
57	K11717	3.2413	1.08e-05	3.7126	7.98e-06	0.1959	0.05338	up
58	K00962	3.272	9.1e-06	3.7045	9.73e-06	0.1791	0.07327	up
59	K03438	3.2651	1.32e-05	3.6799	3.54e-06	0.1725	0.09357	up
60	K02338	3.2731	8.94e-06	3.6757	9.33e-06	0.1674	0.08273	up
61	K02316	3.1319	9.1e-06	3.6677	8.11e-06	0.2278	0.02399	up
62	K00058	3.0108	9.63e-06	3.6527	1.37e-05	0.2788	0.03885	up
63	K03168	3.252	6.91e-06	3.6456	5.26e-06	0.1648	0.02276	up
64	K07391	3.0919	8.83e-06	3.6262	1.32e-05	0.23	0.06333	up
65	K02982	3.173	1.06e-05	3.6234	6.08e-06	0.1915	0.04516	up
66	K01972	3.1937	1.09e-05	3.6176	5.29e-06	0.1798	0.05524	up
67	K02906	3.1964	1.2e-05	3.613	4.8e-06	0.1767	0.07498	up
68	K01890	3.1578	4.72e-06	3.6123	7.46e-06	0.194	0.02115	up
69	K06941	3.1128	1.29e-05	3.5899	6.86e-06	0.2057	0.0721	up
70	K02863	3.1287	1.19e-05	3.5892	6.22e-06	0.1981	0.05851	up
71	K01868	3.1	7.54e-06	3.5867	8.02e-06	0.2104	0.02457	up
72	K02864	3.0856	9.78e-06	3.5863	7.46e-06	0.2169	0.03164	up
73	K01925	3.0582	8.14e-06	3.5797	9.08e-06	0.2272	0.02615	up
74	K00705	3.191	4.19e-06	3.5746	7.1e-06	0.1638	0.02007	up
75	K04066	3.1362	6.99e-06	3.5697	5.61e-06	0.1868	0.01906	up
76	K02600	3.078	9.49e-06	3.5688	5.77e-06	0.2134	0.02434	up
77	K03686	3.0981	8.8e-06	3.5555	8.69e-06	0.1987	0.04374	up
78	K04096	3.0715	1.37e-05	3.5456	6.63e-06	0.2071	0.08243	up
79	K02886	3.1037	9.29e-06	3.5423	6.62e-06	0.1907	0.03874	up
80	K01883	3.1999	5.65e-06	3.5353	5.5e-06	0.1438	0.0253	up
81	K02238	3.0485	1.18e-05	3.5254	3.39e-06	0.2097	0.03743	up
82	K03702	3.1876	6.15e-06	3.5111	7.44e-06	0.1395	0.0648	up
83	K06942	3.1621	8.83e-06	3.5089	4.01e-06	0.1501	0.05095	up
84	K02343	3.0623	1.1e-05	3.4969	5.73e-06	0.1915	0.05426	up
85	K01810	3.0257	8.54e-06	3.4747	7.43e-06	0.1996	0.03432	up
86	K03629	2.9916	8.65e-06	3.4721	4.56e-06	0.2149	0.01985	up
87	K03695	3.0532	6.99e-06	3.4655	9.8e-06	0.1828	0.05953	up
88	K07462	3.1461	6.53e-06	3.4514	6.14e-06	0.1336	0.0608	up
89	K01924	2.9951	8.85e-06	3.4291	4.96e-06	0.1952	0.02598	up
90	K03596	2.984	9.05e-06	3.4269	7.2e-06	0.1997	0.03896	up
91	K06207	3.0405	7.27e-06	3.4261	6.98e-06	0.1723	0.0389	up
92	K09013	2.9948	9.73e-06	3.4258	7.67e-06	0.194	0.05604	up
93	K06168	3.0492	9.1e-06	3.4248	5.59e-06	0.1676	0.05336	up
94	K00790	2.9613	1.24e-05	3.4208	6.11e-06	0.2081	0.06658	up
95	K00703	2.9669	3.77e-06	3.42	9.91e-06	0.205	0.02558	up
96	K01803	3.0055	1.07e-05	3.4089	6.5e-06	0.1817	0.07518	up
97	K01875	2.9712	7.96e-06	3.4073	6.47e-06	0.1975	0.02544	up
98	K01409	2.8927	1e-05	3.4048	8.03e-06	0.2352	0.03398	up
99	K03977	2.9714	6.95e-06	3.3988	7.04e-06	0.1939	0.02534	up
100	K02986	2.9899	1.12e-05	3.3951	6.8e-06	0.1834	0.08408	up
101	K09014	2.9395	9.83e-06	3.3922	4.7e-06	0.2066	0.02805	up
102	K02836	2.9292	1.11e-05	3.3856	6.72e-06	0.2089	0.05339	up
103	K03696	2.9525	9.21e-06	3.383	8.12e-06	0.1964	0.05438	up
104	K02528	2.9229	1.02e-05	3.3782	5.25e-06	0.2089	0.03388	up
105	K00134	2.8856	1.19e-05	3.3767	1.03e-05	0.2267	0.08251	up
106	K01866	3.0528	5.9e-06	3.3755	5.14e-06	0.145	0.02932	up
107	K00806	2.9752	8.99e-06	3.371	6.39e-06	0.1802	0.05022	up
108	K01738	2.817	9.42e-06	3.3705	1.26e-05	0.2588	0.05304	up
109	K00948	2.873	9.73e-06	3.3582	9.17e-06	0.2251	0.04783	up
110	K01835	2.9416	5.98e-06	3.3546	1.08e-05	0.1895	0.06468	up
111	K01881	2.97	6.9e-06	3.3517	7.61e-06	0.1744	0.04354	up
112	K03106	3.0501	6.67e-06	3.3496	6.28e-06	0.1351	0.07208	up
113	K01775	2.8572	7.38e-06	3.3488	8.62e-06	0.229	0.02481	up
114	K00566	2.9737	7.04e-06	3.3482	6.02e-06	0.1712	0.03204	up
115	K00927	3.0523	6.78e-06	3.3391	5.34e-06	0.1296	0.06707	up
116	K18682	2.9262	9.48e-06	3.3345	6.84e-06	0.1884	0.05508	up
117	K06158	3.0144	9.56e-06	3.3285	3.74e-06	0.143	0.08866	up
118	K07456	2.8295	1.03e-05	3.319	7.4e-06	0.2302	0.03832	up
119	K01892	2.9259	1.01e-05	3.2983	5.86e-06	0.1728	0.07586	up
120	K00939	2.966	8.08e-06	3.2918	7.31e-06	0.1504	0.09826	up
121	K01867	2.8248	1.09e-05	3.2918	5.55e-06	0.2207	0.03875	up
122	K02988	2.7436	1.51e-05	3.2886	7.27e-06	0.2614	0.07342	up
123	K02876	2.7766	1.3e-05	3.2833	7.59e-06	0.2418	0.06342	up
124	K01714	2.9072	7.43e-06	3.2806	4.94e-06	0.1743	0.02753	up
125	K01889	2.8835	6.56e-06	3.2801	5.84e-06	0.1859	0.02313	up
126	K01953	2.7335	8.48e-06	3.2747	1.17e-05	0.2606	0.04212	up
127	K03110	2.9382	9.1e-06	3.2632	4.51e-06	0.1513	0.07521	up
128	K06173	2.7989	9.89e-06	3.2448	7.56e-06	0.2133	0.05064	up
129	K02945	2.6454	7.67e-06	3.2428	8.21e-06	0.2937	0.02567	up
130	K02493	2.9309	9.06e-06	3.2378	2.39e-06	0.1437	0.07128	up
131	K02871	2.7859	1.3e-05	3.237	4.65e-06	0.2165	0.07218	up
132	K02028	2.433	1.47e-05	3.2301	9.11e-06	0.4089	0.0203	up
133	K03551	2.9208	7.95e-06	3.2212	4.18e-06	0.1413	0.06542	up
134	K01937	2.7983	7.97e-06	3.2159	4.9e-06	0.2006	0.02352	up
135	K01939	2.8118	8.55e-06	3.214	5.92e-06	0.1929	0.03753	up
136	K00088	2.8239	1.11e-05	3.2077	4.33e-06	0.1838	0.07509	up
137	K06881	2.8662	9.25e-06	3.2062	6e-06	0.1617	0.08592	up
138	K01056	2.8596	8.78e-06	3.1844	4.83e-06	0.1552	0.07388	up
139	K01923	2.7673	1.2e-05	3.1782	3.98e-06	0.1997	0.07394	up
140	K00925	2.6923	7.12e-06	3.1748	1.17e-05	0.2379	0.05292	up
141	K02946	2.6646	1.24e-05	3.1735	6.95e-06	0.2521	0.05099	up
142	K01491	2.8716	8.34e-06	3.1691	3.88e-06	0.1422	0.07441	up
143	K03101	2.8032	9.72e-06	3.1569	5.46e-06	0.1715	0.07738	up
144	K03439	2.8164	1e-05	3.1526	2.97e-06	0.1627	0.07514	up
145	K03979	2.8252	7.73e-06	3.1503	3.68e-06	0.1571	0.03925	up
146	K02935	2.5957	1.27e-05	3.1451	7.9e-06	0.277	0.04514	up
147	K01783	2.7248	7.46e-06	3.1437	8.69e-06	0.2063	0.04596	up
148	K00773	2.7486	7.15e-06	3.1377	6.06e-06	0.191	0.02814	up
149	K02838	2.7453	9.43e-06	3.1364	7.92e-06	0.1921	0.07701	up
150	K00384	2.904	2.71e-06	3.1354	6.67e-06	0.1106	0.07515	up
151	K00600	2.8288	6.54e-06	3.1328	5.02e-06	0.1472	0.0442	up
152	K00981	2.7608	8.75e-06	3.1287	5.43e-06	0.1805	0.05101	up
153	K00831	2.7972	8.14e-06	3.1259	5.64e-06	0.1603	0.06702	up
154	K00099	2.819	7.76e-06	3.118	5.41e-06	0.1455	0.07818	up
155	K03664	2.7671	8.49e-06	3.0932	5.69e-06	0.1607	0.07601	up
156	K02356	2.6231	1.34e-05	3.0919	6.5e-06	0.2373	0.07866	up
157	K06949	2.5689	1.1e-05	3.085	8.05e-06	0.2641	0.03967	up
158	K06187	2.6852	9.77e-06	3.059	6.83e-06	0.188	0.08127	up
159	K02939	2.62	1.11e-05	3.0507	5.48e-06	0.2196	0.05598	up
160	K03665	2.7086	8.72e-06	3.0236	5.77e-06	0.1587	0.09529	up
161	K18707	2.4991	8.23e-06	3.0185	1e-05	0.2724	0.03308	up
162	K06959	2.6472	6.51e-06	3.018	6.22e-06	0.1892	0.02959	up
163	K03177	2.5523	9.72e-06	3.0047	6.5e-06	0.2354	0.03754	up
164	K02013	2.6325	7.9e-06	2.9603	5.44e-06	0.1693	0.06031	up
165	K01591	2.5375	1.05e-05	2.9167	5.05e-06	0.2009	0.0732	up
166	K02899	2.3365	1.2e-05	2.7738	6.44e-06	0.2475	0.07488	up
167	K17828	2.3607	9.32e-06	2.7166	5.38e-06	0.2026	0.06816	up
168	K02025	1.0962	1.23e-05	2.5436	2.55e-05	1.2144	0.02085	up
169	K11175	1.5836	1.39e-05	2.2794	8.61e-06	0.5255	0.02543	up
170	K02057	1.0266	9.62e-06	2.2666	2.1e-05	1.1426	0.03058	up
171	K02026	0.96	1.07e-05	2.2653	2.54e-05	1.2386	0.01854	up
172	K07238	1.3766	1.72e-05	2.243	1.43e-05	0.7044	0.03744	up
173	K01572	1.176	1.7e-05	2.1118	2.18e-05	0.8445	0.0629	up
174	K07282	1.1737	2.05e-05	2.1036	2.1e-05	0.8418	0.07739	up
175	K00975	1.2141	1.25e-05	2.0505	1.49e-05	0.7562	0.02557	up
176	K01200	2.485	1.17e-05	2.0015	9.76e-06	-0.3122	0.07738	down
177	K00179	1.0424	1.47e-05	1.9773	2.27e-05	0.9237	0.05755	up
178	K16787	0.883	1.39e-05	1.9571	1.71e-05	1.1482	0.01907	up
179	K02027	0.922	9.16e-06	1.9183	2.06e-05	1.057	0.02417	up
180	K16786	0.902	1.38e-05	1.9147	1.63e-05	1.0859	0.01824	up
181	K03525	1.0055	1.47e-05	1.9129	1.92e-05	0.9278	0.04111	up
182	K21071	0.952	1.13e-05	1.839	1.68e-05	0.9499	0.02378	up
183	K16785	0.794	1.3e-05	1.8171	1.53e-05	1.1944	0.02031	up
184	K02035	0.796	1.11e-05	1.7584	1.61e-05	1.1434	0.02001	up
185	K12574	1.3588	1.1e-05	1.7511	7.01e-06	0.366	0.09559	up
186	K04758	0.861	1.04e-05	1.7322	1.46e-05	1.0085	0.01874	up
187	K00180	0.908	1.35e-05	1.691	1.95e-05	0.8971	0.06812	up
188	K10112	0.906	1.36e-05	1.6301	1.91e-05	0.8473	0.08565	up
189	K01356	0.943	1.25e-05	1.6206	1.43e-05	0.7812	0.05137	up
190	K04486	0.861	1.15e-05	1.564	8.69e-06	0.8611	0.01938	up
191	K03559	0.824	1.02e-05	1.5587	1.34e-05	0.9196	0.02413	up
192	K07720	0.602	9.98e-06	1.4964	1.3e-05	1.3137	0.04794	up
193	K01012	0.845	9.83e-06	1.4516	1.18e-05	0.7806	0.03501	up
194	K01768	0.221	5.35e-06	1.4381	2.21e-05	2.7021	0.0277	up
195	K07089	0.741	1.27e-05	1.3926	1.55e-05	0.9102	0.07315	up
196	K17318	0.467	6.14e-06	1.3832	1.98e-05	1.5665	0.02443	up
197	K03218	0.75	8.15e-06	1.3672	1.01e-05	0.8662	0.01877	up
198	K02031	0.6	8.03e-06	1.356	1.13e-05	1.1763	0.0659	up
199	K00611	0.747	6.34e-06	1.3255	1.12e-05	0.8273	0.02313	up
200	K02033	0.578	7.82e-06	1.318	1.24e-05	1.1892	0.01954	up
201	K07003	0.523	7.8e-06	1.2992	1.43e-05	1.3127	0.01863	up
202	K17320	0.413	6.74e-06	1.2928	1.89e-05	1.6462	0.02411	up
203	K13292	0.76	9.2e-06	1.2819	5.8e-06	0.7542	0.01887	up
204	K02034	0.553	6.94e-06	1.2812	1.2e-05	1.2121	0.02546	up
205	K17319	0.428	7.33e-06	1.2798	1.97e-05	1.5802	0.03181	up
206	K02117	0.609	8e-06	1.2251	1.32e-05	1.0084	0.03328	up
207	K01999	0.653	1.17e-05	1.225	8.95e-06	0.9076	0.0373	up
208	K02614	0.674	9.73e-06	1.222	1.47e-05	0.8584	0.08355	up
209	K02056	0.531	4.57e-06	1.2016	1.08e-05	1.1782	0.06375	up
210	K03529	0.649	8.94e-06	1.1964	8.64e-06	0.8824	0.02413	up
211	K02118	0.614	8.16e-06	1.185	1.17e-05	0.9486	0.03348	up
212	K07260	0.639	1.07e-05	1.1836	9.53e-06	0.8892	0.0391	up
213	K01661	1.5985	1.15e-05	1.1784	4.77e-06	-0.4399	0.06323	down
214	K02123	0.595	7.57e-06	1.1739	1.23e-05	0.9803	0.03318	up
215	K11069	0.604	7.95e-06	1.161	1.02e-05	0.9427	0.0255	up
216	K07718	0.467	8.11e-06	1.1583	1.21e-05	1.3106	0.01839	up
217	K00639	0.677	6.6e-06	1.1524	1.3e-05	0.7674	0.0723	up
218	K02050	0.513	6.12e-06	1.1498	1.01e-05	1.1643	0.03227	up
219	K06346	0.684	1.01e-05	1.1421	5.95e-06	0.7396	0.03636	up
220	K16898	0.685	9.49e-06	1.1382	8.3e-06	0.7326	0.0497	up
221	K09747	0.676	8.23e-06	1.1235	7.46e-06	0.7329	0.0319	up
222	K11189	0.633	9.64e-06	1.1121	8.49e-06	0.813	0.04222	up
223	K03431	0.69	8.53e-06	1.1084	7.97e-06	0.6838	0.05086	up
224	K00943	0.586	6.63e-06	1.1062	1.13e-05	0.9166	0.03385	up
225	K01911	1.5574	1.35e-05	1.1059	4.83e-06	-0.4939	0.07953	down
226	K02072	0.679	1.07e-05	1.1057	8.88e-06	0.7035	0.08766	up
227	K08483	0.628	9.31e-06	1.0885	1.04e-05	0.7935	0.06816	up
228	K09815	0.538	6.54e-06	1.0756	1e-05	0.9994	0.02293	up
229	K03621	0.684	6.87e-06	1.0734	8.22e-06	0.6502	0.04736	up
230	K02124	0.496	7.01e-06	1.0712	1.12e-05	1.1108	0.02428	up
231	K07053	0.632	6.22e-06	1.0697	8.12e-06	0.7592	0.02564	up
232	K02121	0.497	6.77e-06	1.065	1.13e-05	1.0996	0.02557	up
233	K10439	0.461	6.71e-06	1.0534	8.81e-06	1.1922	0.02906	up
234	K02120	0.554	7.02e-06	1.0529	1.11e-05	0.9264	0.03905	up
235	K06179	0.502	6.56e-06	1.0511	1.08e-05	1.0661	0.02446	up
236	K10947	0.455	6.93e-06	1.0333	1.19e-05	1.1833	0.02707	up
237	K02011	0.641	8.44e-06	1.0222	8.47e-06	0.6733	0.07591	up
238	K03150	0.652	6.67e-06	1.0192	7.73e-06	0.6445	0.04949	up
239	K03546	0.657	6.33e-06	1.019	5.61e-06	0.6332	0.02579	up
240	K01515	0.628	7.66e-06	1.0185	6.8e-06	0.6976	0.03894	up
241	K00974	0.642	7.78e-06	1.0124	7.19e-06	0.6572	0.05484	up
242	K03976	0.518	5.25e-06	1.0119	1.18e-05	0.966	0.03849	up
243	K04070	0.509	7.43e-06	0.988	6.72e-06	0.9568	0.01847	up
244	K03523	0.514	7.85e-06	0.988	6.97e-06	0.9427	0.02336	up
245	K02652	0.572	8.81e-06	0.986	8.36e-06	0.7856	0.06037	up
246	K18672	0.507	8.23e-06	0.98	6.01e-06	0.9508	0.02005	up
247	K04488	0.574	8.48e-06	0.977	5.85e-06	0.7673	0.03633	up
248	K11072	0.52	7.45e-06	0.975	7.46e-06	0.9069	0.02519	up
249	K15580	0.448	7.35e-06	0.975	1.18e-05	1.1219	0.03954	up
250	K07042	0.606	7.22e-06	0.969	7.79e-06	0.6772	0.06035	up
251	K20276	0.536	7.85e-06	0.968	8.09e-06	0.8528	0.03917	up
252	K07576	0.533	7.14e-06	0.967	6.99e-06	0.8594	0.02455	up
253	K04517	0.489	8.38e-06	0.961	7.24e-06	0.9747	0.0255	up
254	K01786	0.586	7.66e-06	0.958	8.43e-06	0.7091	0.07214	up
255	K04083	0.593	7.49e-06	0.943	7.43e-06	0.6692	0.06717	up
256	K00528	0.482	7.4e-06	0.941	6.76e-06	0.9652	0.02149	up
257	K06213	0.447	5.75e-06	0.939	1.13e-05	1.0709	0.03754	up
258	K11070	0.506	6.67e-06	0.931	6.98e-06	0.8796	0.02429	up
259	K09817	0.453	5.91e-06	0.924	7.87e-06	1.0284	0.01899	up
260	K11071	0.493	5.95e-06	0.923	7.85e-06	0.9047	0.02397	up
261	K01745	0.471	5.9e-06	0.918	1.1e-05	0.9628	0.05108	up
262	K16899	0.571	8.85e-06	0.912	6.02e-06	0.6755	0.07584	up
263	K09816	0.451	5.34e-06	0.91	7.82e-06	1.0127	0.01865	up
264	K08591	0.554	7.37e-06	0.91	7.03e-06	0.716	0.05528	up
265	K14170	0.431	6.52e-06	0.906	9.16e-06	1.0718	0.02649	up
266	K02588	0.424	7.16e-06	0.905	8.3e-06	1.0939	0.02383	up
267	K07030	0.559	7.16e-06	0.903	6.9e-06	0.6919	0.05751	up
268	K03705	0.576	9.02e-06	0.902	4.76e-06	0.6471	0.0757	up
269	K02434	0.504	8.59e-06	0.891	6.78e-06	0.822	0.05299	up
270	K02653	0.554	8.81e-06	0.889	6.49e-06	0.6823	0.08869	up
271	K04771	0.531	8.58e-06	0.888	5.32e-06	0.7418	0.05285	up
272	K02433	0.497	8.72e-06	0.884	7.44e-06	0.8308	0.06311	up
273	K06024	0.47	8.15e-06	0.881	5.82e-06	0.9065	0.02974	up
274	K01995	0.504	7.19e-06	0.878	3.54e-06	0.8008	0.01948	up
275	K01996	0.459	7.01e-06	0.874	3.86e-06	0.9291	0.02281	up
276	K07192	0.427	5.35e-06	0.873	1.23e-05	1.0317	0.0665	up
277	K05896	0.464	7.85e-06	0.871	5.38e-06	0.9085	0.02553	up
278	K10823	0.458	7.04e-06	0.867	8.81e-06	0.9207	0.04792	up
279	K06960	0.498	8.07e-06	0.857	4.91e-06	0.7831	0.03919	up
280	K09762	0.537	8.72e-06	0.854	4.65e-06	0.6693	0.07473	up
281	K07124	0.465	7.61e-06	0.853	6.46e-06	0.8753	0.03736	up
282	K00003	0.492	7.34e-06	0.85	4.63e-06	0.7888	0.02918	up
283	K01997	0.508	7.31e-06	0.85	4.32e-06	0.7426	0.03231	up
284	K14540	0.543	8.18e-06	0.85	4.08e-06	0.6465	0.06439	up
285	K07738	0.467	6.56e-06	0.848	5.24e-06	0.8606	0.02268	up
286	K01998	0.481	6.74e-06	0.843	4.5e-06	0.8095	0.02337	up
287	K03742	0.432	7.31e-06	0.839	1.04e-05	0.9576	0.07505	up
288	K03789	0.529	6.48e-06	0.834	5.13e-06	0.6568	0.044	up
289	K06183	0.353	4.14e-06	0.831	8.51e-06	1.2352	0.01906	up
290	K00074	0.397	7.19e-06	0.83	8.39e-06	1.064	0.03633	up
291	K06412	0.41	7.51e-06	0.827	8.51e-06	1.0123	0.04517	up
292	K03412	0.461	8.28e-06	0.823	7.8e-06	0.8361	0.07654	up
293	K03407	0.414	6.39e-06	0.822	8.55e-06	0.9895	0.03914	up
294	K06381	0.493	7.95e-06	0.821	5.58e-06	0.7358	0.06304	up
295	K03151	0.478	4.7e-06	0.811	6.98e-06	0.7627	0.03515	up
296	K06958	0.531	7.37e-06	0.811	5.64e-06	0.611	0.09461	up
297	K01571	0.403	4.77e-06	0.809	6.1e-06	1.0054	0.02427	up
298	K07574	0.472	6.6e-06	0.803	6.16e-06	0.7666	0.04514	up
299	K02237	0.446	7.76e-06	0.793	5.24e-06	0.8303	0.04432	up
300	K01693	0.363	5.64e-06	0.789	5.22e-06	1.1201	0.0714	up
301	K02647	0.437	5.49e-06	0.788	5.72e-06	0.8506	0.0246	up
302	K01151	0.448	4.59e-06	0.784	6.11e-06	0.8074	0.02411	up
303	K03558	0.383	3.73e-06	0.784	8.85e-06	1.0335	0.02771	up
304	K06972	0.418	6.25e-06	0.782	5.14e-06	0.9037	0.02294	up
305	K12960	0.454	6.45e-06	0.771	6.51e-06	0.764	0.05735	up
306	K03216	0.508	6.34e-06	0.768	5.25e-06	0.5963	0.07832	up
307	K01926	0.387	3.59e-06	0.764	7.11e-06	0.9812	0.01843	up
308	K00575	0.376	6.73e-06	0.763	7.89e-06	1.021	0.04235	up
309	K00375	0.369	5.99e-06	0.762	5.96e-06	1.0462	0.01993	up
310	K11105	0.425	3.84e-06	0.762	1.06e-05	0.8423	0.09773	up
311	K05832	0.492	7.11e-06	0.759	4.4e-06	0.6254	0.07587	up
312	K01214	0.396	6.49e-06	0.757	7.61e-06	0.9348	0.04914	up
313	K11928	0.468	7.29e-06	0.753	5.47e-06	0.6861	0.08155	up
314	K07814	0.368	5.12e-06	0.75	8.12e-06	1.0272	0.03399	up
315	K05833	0.492	6.62e-06	0.741	4.42e-06	0.5908	0.08244	up
316	K00620	0.371	5.16e-06	0.736	5.41e-06	0.9883	0.01992	up
317	K07183	0.354	5.1e-06	0.736	4.92e-06	1.056	0.03695	up
318	K03568	0.413	3.47e-06	0.731	9e-06	0.8237	0.06889	up
319	K01626	0.372	5.3e-06	0.73	6.57e-06	0.9726	0.02567	up
320	K15583	0.418	6.65e-06	0.718	6.77e-06	0.7805	0.07848	up
321	K01251	0.393	5.35e-06	0.714	6.28e-06	0.8614	0.03714	up
322	K02049	0.463	4.97e-06	0.708	5.11e-06	0.6127	0.05847	up
323	K07023	0.285	6.62e-06	0.702	5.54e-06	1.3005	0.01879	up
324	K15582	0.376	6.68e-06	0.7	6.59e-06	0.8966	0.05737	up
325	K15581	0.373	7.4e-06	0.7	8.03e-06	0.9082	0.09806	up
326	K07150	0.411	5.23e-06	0.697	6.37e-06	0.762	0.05654	up
327	K13525	1.0532	8.41e-06	0.695	5.8e-06	-0.5997	0.05439	down
328	K02591	0.212	3.04e-06	0.694	8.63e-06	1.7109	0.02477	up
329	K07584	0.401	5.39e-06	0.693	4.81e-06	0.7893	0.03217	up
330	K06967	0.417	6.81e-06	0.691	2.94e-06	0.7286	0.04403	up
331	K03072	0.401	4.94e-06	0.691	6.99e-06	0.7851	0.06303	up
332	K07461	0.347	5.15e-06	0.689	7.95e-06	0.9896	0.04893	up
333	K07742	0.389	7.73e-06	0.687	3.92e-06	0.8205	0.05857	up
334	K11358	0.409	5.35e-06	0.682	5.45e-06	0.7377	0.05116	up
335	K01192	0.395	5.34e-06	0.68	7.57e-06	0.7837	0.08633	up
336	K03592	0.364	3.38e-06	0.677	8.13e-06	0.8952	0.05204	up
337	K06442	0.4	6.57e-06	0.676	3.68e-06	0.757	0.04536	up
338	K19055	0.369	3.12e-06	0.675	8.31e-06	0.8713	0.05815	up
339	K02226	0.382	6.03e-06	0.673	5.65e-06	0.817	0.05309	up
340	K03296	0.343	4.18e-06	0.671	8.73e-06	0.9681	0.06189	up
341	K07015	0.365	6.43e-06	0.666	6.48e-06	0.8676	0.06845	up
342	K02586	0.224	3.09e-06	0.664	7.55e-06	1.5677	0.03491	up
343	K07313	0.395	4.9e-06	0.662	7.45e-06	0.745	0.09767	up
344	K00626	0.395	6.21e-06	0.659	4.98e-06	0.7384	0.06673	up
345	K03856	0.387	6.93e-06	0.656	3.59e-06	0.7614	0.05838	up
346	K06023	0.281	3.86e-06	0.655	6.31e-06	1.2209	0.01952	up
347	K00805	0.393	5.26e-06	0.646	3.36e-06	0.717	0.03238	up
348	K03820	0.302	2.59e-06	0.641	8.54e-06	1.0858	0.03912	up
349	K08602	0.304	6.02e-06	0.638	6.55e-06	1.0695	0.04078	up
350	K03074	0.366	4.74e-06	0.636	7.69e-06	0.7972	0.09824	up
351	K01439	0.356	4.54e-06	0.627	6.61e-06	0.8166	0.06282	up
352	K00336	0.327	5.65e-06	0.626	8e-06	0.9369	0.0891	up
353	K07979	0.277	2.99e-06	0.625	1.04e-05	1.174	0.07503	up
354	K07080	0.37	5.03e-06	0.624	5.96e-06	0.754	0.07215	up
355	K02435	0.34	6.17e-06	0.618	6.53e-06	0.8621	0.08498	up
356	K00882	0.372	5.65e-06	0.617	2.85e-06	0.73	0.03743	up
357	K07736	0.364	5.45e-06	0.617	4.62e-06	0.7613	0.05268	up
358	K10440	0.313	7.37e-06	0.61	5.46e-06	0.9626	0.0747	up
359	K01739	0.26	4.78e-06	0.604	4.92e-06	1.216	0.0192	up
360	K01468	0.34	3.72e-06	0.601	7.94e-06	0.8218	0.09952	up
361	K13280	0.321	6.01e-06	0.598	6.73e-06	0.8976	0.0878	up
362	K02502	0.344	6.08e-06	0.582	2.88e-06	0.7586	0.05276	up
363	K06940	0.254	3.12e-06	0.574	7.5e-06	1.1762	0.03504	up
364	K03699	0.351	6.03e-06	0.571	3.25e-06	0.702	0.07522	up
365	K03113	0.237	3.99e-06	0.571	9.6e-06	1.2686	0.0753	up
366	K02499	0.284	5.2e-06	0.567	5.3e-06	0.9975	0.03894	up
367	K03660	0.315	6.38e-06	0.567	3.98e-06	0.848	0.06514	up
368	K00965	0.36	4.3e-06	0.565	3.88e-06	0.6503	0.05261	up
369	K03790	0.242	3.93e-06	0.562	6.87e-06	1.2156	0.03203	up
370	K01267	0.361	4.66e-06	0.562	4.14e-06	0.6386	0.07521	up
371	K02806	0.19	4.38e-06	0.56	9.85e-06	1.5594	0.05921	up
372	K01677	0.334	4.28e-06	0.557	6e-06	0.7378	0.09366	up
373	K02203	0.2	2.9e-06	0.555	6.47e-06	1.4725	0.01873	up
374	K09121	0.29	4.8e-06	0.553	4.28e-06	0.9312	0.02984	up
375	K02371	0.343	4.87e-06	0.553	4.64e-06	0.6891	0.08157	up
376	K02032	0.274	3.44e-06	0.544	6.54e-06	0.9894	0.04625	up
377	K06864	0.305	4.35e-06	0.543	3.47e-06	0.8321	0.02539	up
378	K06894	0.248	3.84e-06	0.54	6.99e-06	1.1226	0.04584	up
379	K01507	0.281	3.33e-06	0.537	6.8e-06	0.9344	0.06287	up
380	K02058	0.202	3.77e-06	0.527	5.21e-06	1.3834	0.02002	up
381	K07816	0.316	4.63e-06	0.527	4.85e-06	0.7379	0.07852	up
382	K01678	0.284	3.5e-06	0.517	5.25e-06	0.8643	0.04399	up
383	K02410	0.244	4.23e-06	0.513	5.68e-06	1.0721	0.0396	up
384	K18475	0.272	4.73e-06	0.508	4.52e-06	0.9012	0.04937	up
385	K06923	0.295	4.27e-06	0.505	3.64e-06	0.7756	0.04205	up
386	K02911	0.302	3.64e-06	0.503	5.07e-06	0.736	0.07449	up
387	K00997	0.253	5.09e-06	0.495	4.53e-06	0.9683	0.05128	up
388	K00878	0.236	4.62e-06	0.492	3.53e-06	1.0599	0.0238	up
389	K03980	0.251	3.26e-06	0.49	6.7e-06	0.9651	0.07512	up
390	K09793	0.188	4.02e-06	0.478	7.15e-06	1.3463	0.05277	up
391	K00972	0.245	4.49e-06	0.474	5.34e-06	0.9521	0.07105	up
392	K01560	0.24	4.01e-06	0.473	6.05e-06	0.9788	0.07505	up
393	K00284	0.241	4.16e-06	0.472	5.06e-06	0.9698	0.05351	up
394	K07035	0.163	2.47e-06	0.455	7.27e-06	1.481	0.039	up
395	K01002	0.203	3.31e-06	0.454	4.9e-06	1.1612	0.02543	up
396	K16957	0.167	4.42e-06	0.454	7.72e-06	1.4428	0.07479	up
397	K02122	0.206	3.59e-06	0.449	4.12e-06	1.1241	0.02436	up
398	K06898	0.254	4.43e-06	0.449	2.85e-06	0.8219	0.04432	up
399	K02585	0.177	2.8e-06	0.446	4.49e-06	1.3333	0.01991	up
400	K06206	0.234	4.14e-06	0.436	3.98e-06	0.8978	0.05338	up
401	K09775	0.197	3.67e-06	0.434	4.33e-06	1.1395	0.02749	up
402	K05367	0.191	3.57e-06	0.433	5.81e-06	1.1808	0.05217	up
403	K16960	0.111	2.5e-06	0.412	5.58e-06	1.8921	0.01966	up
404	K03388	0.204	3.68e-06	0.41	3.54e-06	1.0071	0.03196	up
405	K16511	0.216	3.65e-06	0.41	4.94e-06	0.9246	0.07864	up
406	K02662	0.226	3.01e-06	0.4	4.8e-06	0.8237	0.08768	up
407	K02119	0.224	3.49e-06	0.392	2.53e-06	0.8074	0.03752	up
408	K12506	0.146	3.02e-06	0.39	5.74e-06	1.4175	0.04017	up
409	K00844	0.214	4.08e-06	0.387	4.09e-06	0.8547	0.09702	up
410	K00091	0.116	2.25e-06	0.385	7.04e-06	1.7307	0.04781	up
411	K10548	0.183	3.46e-06	0.381	4.74e-06	1.0579	0.06291	up
412	K10547	0.155	3.08e-06	0.38	4.87e-06	1.2937	0.0365	up
413	K05350	0.148	2.9e-06	0.378	4.63e-06	1.3528	0.0268	up
414	K16959	0.13	3.95e-06	0.36	5.9e-06	1.4695	0.07355	up
415	K03390	0.155	4.23e-06	0.355	3.15e-06	1.1956	0.03953	up
416	K00616	0.21	3.32e-06	0.343	2.95e-06	0.7078	0.09893	up
417	K19350	0.161	3.28e-06	0.339	3.32e-06	1.0742	0.03888	up
418	K13653	0.12	1.64e-06	0.337	5.52e-06	1.4897	0.04021	up
419	K01679	0.13	2.25e-06	0.329	3.38e-06	1.3396	0.01962	up
420	K09693	0.174	3e-06	0.325	2.9e-06	0.9014	0.04883	up
421	K16328	0.141	3.47e-06	0.325	4.29e-06	1.2047	0.06677	up
422	K03394	0.205	3.43e-06	0.325	1.54e-06	0.6648	0.07523	up
423	K01843	0.112	1.94e-06	0.325	6.62e-06	1.5369	0.0858	up
424	K01596	0.0876	1.42e-06	0.308	4.22e-06	1.8139	0.01969	up
425	K19167	0.122	2.35e-06	0.307	4.22e-06	1.3314	0.03862	up
426	K10012	0.15	1.72e-06	0.306	4.39e-06	1.0286	0.06738	up
427	K01271	0.0978	2.62e-06	0.305	4.06e-06	1.6409	0.02547	up
428	K16958	0.0939	2.21e-06	0.304	4.76e-06	1.6949	0.03323	up
429	K06518	0.16	1.65e-06	0.303	4.27e-06	0.9212	0.08271	up
430	K02456	0.142	2.61e-06	0.301	4.35e-06	1.0839	0.07998	up
431	K10192	0.153	3.09e-06	0.3	3.37e-06	0.9714	0.07436	up
432	K15555	0.0654	1.42e-06	0.294	6.6e-06	2.1685	0.0628	up
433	K04088	0.144	3.11e-06	0.292	3.61e-06	1.0199	0.08373	up
434	K03785	0.15	3.37e-06	0.292	3.15e-06	0.961	0.08766	up
435	K09005	0.131	2.8e-06	0.291	2.81e-06	1.1515	0.03207	up
436	K09692	0.152	2.72e-06	0.289	3e-06	0.927	0.06285	up
437	K05936	0.163	2.68e-06	0.287	3.12e-06	0.8162	0.09446	up
438	K20532	0.122	2.51e-06	0.282	4.55e-06	1.2088	0.08596	up
439	K03389	0.139	3.34e-06	0.279	3.05e-06	1.0052	0.0857	up
440	K01760	0.148	1.82e-06	0.274	3.16e-06	0.8886	0.05764	up
441	K15921	0.104	2.1e-06	0.273	3.54e-06	1.3923	0.02993	up
442	K02189	0.161	2.72e-06	0.27	2.22e-06	0.7459	0.08378	up
443	K20533	0.119	2.62e-06	0.27	4.25e-06	1.182	0.0942	up
444	K09798	0.0628	2.26e-06	0.269	4.7e-06	2.0988	0.03446	up
445	K09770	0.139	3.07e-06	0.269	2.61e-06	0.9525	0.07442	up
446	K00005	0.122	3.57e-06	0.265	3.1e-06	1.1191	0.09355	up
447	K03328	0.131	2.19e-06	0.26	3.31e-06	0.9889	0.07259	up
448	K07646	0.154	2.54e-06	0.258	2e-06	0.7444	0.07522	up
449	K16149	0.0954	2.29e-06	0.254	3.95e-06	1.4128	0.05589	up
450	K07502	0.13	2.44e-06	0.254	2.96e-06	0.9663	0.07458	up
451	K03409	0.12	2.61e-06	0.253	2.97e-06	1.0761	0.06331	up
452	K06013	0.123	2.19e-06	0.252	3.08e-06	1.0348	0.06052	up
453	K06867	0.0233	7.23e-07	0.25	4.47e-06	3.4235	0.01905	up
454	K17076	0.131	2.3e-06	0.25	2.75e-06	0.9324	0.06815	up
455	K05967	0.0612	1.89e-06	0.249	4.45e-06	2.0245	0.03744	up
456	K06182	0.122	2.16e-06	0.244	3.14e-06	1	0.07585	up
457	K05825	0.111	2.22e-06	0.237	2.86e-06	1.0943	0.05594	up
458	K09007	0.117	2.35e-06	0.237	2.98e-06	1.0184	0.07739	up
459	K07667	0.143	1.92e-06	0.236	1.53e-06	0.7228	0.03945	up
460	K14682	0.0829	1.91e-06	0.233	4.34e-06	1.4909	0.07714	up
461	K20531	0.101	2.24e-06	0.231	3.36e-06	1.1935	0.07485	up
462	K16926	0.039	6.69e-07	0.221	3.81e-06	2.5025	0.01876	up
463	K05813	0.0731	1.47e-06	0.221	3.24e-06	1.5961	0.02833	up
464	K00547	0.114	2.47e-06	0.218	2.24e-06	0.9353	0.08207	up
465	K00836	0.0736	2.08e-06	0.215	3.06e-06	1.5466	0.03911	up
466	K03518	0.0669	1.18e-06	0.208	2.92e-06	1.6365	0.02287	up
467	K10543	0.047	1.1e-06	0.207	3.91e-06	2.1389	0.03523	up
468	K13497	0.049	1.22e-06	0.207	3.83e-06	2.0788	0.0357	up
469	K06976	0.0166	5.11e-07	0.206	3.14e-06	3.6334	0.06142	up
470	K09927	0.0178	5.97e-07	0.205	3.95e-06	3.5257	0.01904	up
471	K00033	0.0822	1.57e-06	0.205	2.9e-06	1.3184	0.04303	up
472	K00355	0.0352	1.34e-06	0.203	3.37e-06	2.5278	0.0204	up
473	K05820	0.077	1.7e-06	0.2	3e-06	1.3771	0.05098	up
474	K01523	0.0858	2.15e-06	0.194	2.71e-06	1.177	0.08157	up
475	K16924	0.0599	1.53e-06	0.183	2.53e-06	1.6112	0.02827	up
476	K13004	0.0835	1.47e-06	0.182	2.89e-06	1.1241	0.09381	up
477	K00681	0.0973	1.43e-06	0.182	2.44e-06	0.9034	0.09885	up
478	K10843	0.0371	1.35e-06	0.18	3.27e-06	2.2785	0.03199	up
479	K11184	0.0754	1.57e-06	0.176	2.37e-06	1.2229	0.05305	up
480	K02584	0.0314	1.02e-06	0.174	2.96e-06	2.4703	0.02176	up
481	K19956	0.0674	1.56e-06	0.174	2.77e-06	1.3683	0.06645	up
482	K04566	0.0583	1.15e-06	0.17	2.27e-06	1.544	0.02412	up
483	K02103	0.075	9.09e-07	0.167	1.54e-06	1.1549	0.02181	up
484	K01476	0.0253	8.14e-07	0.166	2.96e-06	2.714	0.02109	up
485	K02020	0.102	1.29e-06	0.165	1.03e-06	0.6939	0.0391	up
486	K00248	0.0572	7.73e-07	0.164	3.42e-06	1.5196	0.09299	up
487	K00897	0.0473	1.82e-06	0.161	2.13e-06	1.7671	0.03191	up
488	K09859	0.0286	1.03e-06	0.159	2.95e-06	2.4749	0.02737	up
489	K09003	0.0262	7.3e-07	0.156	2.81e-06	2.5739	0.02319	up
490	K09858	0.0205	7.56e-07	0.155	2.71e-06	2.9186	0.01874	up
491	K07337	0.0272	1.16e-06	0.155	2.76e-06	2.5106	0.02561	up
492	K03148	0.0434	8.87e-07	0.152	2.2e-06	1.8083	0.02178	up
493	K15856	0.0716	9.79e-07	0.152	2e-06	1.086	0.05028	up
494	K07016	0.0731	1.37e-06	0.151	1.57e-06	1.0466	0.04044	up
495	K03652	0.0712	1.72e-06	0.146	1.81e-06	1.036	0.09958	up
496	K09002	0.052	1.28e-06	0.142	1.61e-06	1.4493	0.02412	up
497	K03732	0.0201	5.83e-07	0.141	2.44e-06	2.8104	0.0186	up
498	K02533	0.0151	5.68e-07	0.141	2.5e-06	3.2231	0.01946	up
499	K15034	0.0152	6.18e-07	0.139	2.74e-06	3.1929	0.0241	up
500	K16784	0.0138	5.01e-07	0.137	2.51e-06	3.3114	0.01851	up
501	K02431	0.0662	7.61e-07	0.135	1.47e-06	1.0281	0.0274	up
502	K13832	0.0161	5.51e-07	0.134	2.21e-06	3.0571	0.0215	up
503	K19140	0.0495	1.28e-06	0.134	1.93e-06	1.4367	0.04752	up
504	K07101	0.0253	9.46e-07	0.132	2.18e-06	2.3833	0.02297	up
505	K19138	0.0483	1.21e-06	0.129	2.1e-06	1.4173	0.06597	up
506	K03720	0.0142	5.25e-07	0.127	2.38e-06	3.1609	0.01985	up
507	K01266	0.0502	1.21e-06	0.127	2.09e-06	1.3391	0.07753	up
508	K18941	0.0066	2.9e-07	0.126	2.38e-06	4.2504	0.01854	up
509	K19139	0.0461	1.15e-06	0.126	1.67e-06	1.4506	0.03498	up
510	K02064	0.0109	5.77e-07	0.123	2.28e-06	3.4963	0.01862	up
511	K13745	0.0108	4.44e-07	0.121	2.24e-06	3.4859	0.01892	up
512	K03214	0.0053	2.72e-07	0.121	2.2e-06	4.5265	0.02414	up
513	K02062	0.0109	3.05e-07	0.119	2.2e-06	3.4486	0.01906	up
514	K07062	0.0317	9.76e-07	0.117	2.08e-06	1.884	0.04414	up
515	K06968	0.0064	2.35e-07	0.116	2.09e-06	4.1754	0.02349	up
516	K00984	0.0175	7.91e-07	0.116	3.22e-06	2.7287	0.09903	up
517	K02063	0.0114	4.21e-07	0.115	1.91e-06	3.3345	0.02722	up
518	K11927	0.0517	8.32e-07	0.114	1.89e-06	1.1408	0.09556	up
519	K11615	0.0087	2.67e-07	0.113	2.04e-06	3.6942	0.01886	up
520	K08988	0.0047	2.42e-07	0.106	2.06e-06	4.5107	0.0192	up
521	K01496	0.0285	6.53e-07	0.0992	1.61e-06	1.7994	0.03185	up
522	K02383	0.0051	2.13e-07	0.096	1.65e-06	4.2458	0.05536	up
523	K19303	0.0046	1.36e-07	0.0915	1.82e-06	4.3047	0.01852	up
524	K03300	0.039	9.19e-07	0.0865	9.7e-07	1.1492	0.05206	up
525	K00333	0.0293	8.98e-07	0.0827	1.55e-06	1.497	0.09876	up
526	K13893	0.0199	7.07e-07	0.079	1.51e-06	1.9891	0.05307	up
527	K07696	0.0239	7.62e-07	0.0785	1.67e-06	1.7157	0.09927	up
528	K04568	0.0217	9.19e-07	0.075	1.48e-06	1.7892	0.08877	up
529	K03745	0.0123	5.81e-07	0.0745	1.52e-06	2.5986	0.03871	up
530	K09131	0.0234	6.83e-07	0.0724	1.06e-06	1.6295	0.03768	up
531	K02488	0.0037	1.76e-07	0.0681	1.21e-06	4.2099	0.02565	up
532	K15372	0.0274	9.26e-07	0.0664	8.4e-07	1.277	0.08259	up
533	K07002	0.0137	6.34e-07	0.0656	1.32e-06	2.2595	0.05277	up
534	K07516	0.0295	7.04e-07	0.0641	8.61e-07	1.1196	0.08367	up
535	K07776	0.0162	5.14e-07	0.0597	1.35e-06	1.8817	0.09454	up
536	K13894	0.0127	4.6e-07	0.056	9.96e-07	2.1406	0.03506	up
537	K09792	0.0003	3.18e-08	0.0538	1.05e-06	7.4024	0.02024	up
538	K07686	0.0003	3.18e-08	0.0401	9.84e-07	6.9784	0.03201	up
539	K08566	0.0003	2.96e-08	0.0393	1.05e-06	7.0528	0.04418	up
540	K00161	0.0143	4.33e-07	0.0375	5.82e-07	1.3909	0.07489	up
541	K00185	0.01	2.88e-07	0.0372	6.91e-07	1.8953	0.04797	up
542	K00184	0.0073	2.46e-07	0.036	8.62e-07	2.3001	0.07484	up
543	K06045	0.0009	6.05e-08	0.034	8.96e-07	5.2967	0.04424	up
544	K05982	0.0062	1.87e-07	0.0331	5.8e-07	2.4258	0.02483	up
545	K19693	0.0021	1.15e-07	0.0311	8.79e-07	3.9092	0.07195	up
546	K11691	0.0029	1.72e-07	0.0298	6.23e-07	3.3463	0.02819	up
547	K14981	0.0011	7.18e-08	0.0195	5.25e-07	4.2013	0.05597	up
548	K02480	0.0034	1.89e-07	0.0189	4.2e-07	2.4579	0.06424	up
549	K07033	0.0061	2.13e-07	0.0181	2.9e-07	1.5738	0.06647	up
550	K13582	0.0013	8.88e-08	0.0135	3.54e-07	3.3327	0.06655	up
551	K07749	0.0033	1.41e-07	0.0133	2.78e-07	2.0241	0.07508	up
552	K19244	0.0012	6.81e-08	0.0088	2.16e-07	2.8323	0.06728	up
553	K14127	0.0016	8.49e-08	0.0087	2.23e-07	2.4211	0.09914	up
554	K14124	0.0007	4.97e-08	0.0087	2.41e-07	3.5622	0.07456	up
555	K14125	0.0007	7.29e-08	0.0078	2.27e-07	3.425	0.09935	up
556	K07482	0.0008	5.31e-08	0.0063	1.33e-07	3.0266	0.03735	up
557	K14121	0.0003	2.92e-08	0.0061	1.67e-07	4.3777	0.06159	up
558	K05884	0.0015	6.89e-08	0.006	1.26e-07	1.9903	0.08385	up
559	K02688	0.0012	5.37e-08	0.0058	9.17e-08	2.2399	0.02518	up
560	K14110	0	0	0.0052	1.74e-07	#DIV/0!	0.09775	up
561	K11528	0.0002	1.62e-08	0.0038	1.08e-07	4.5367	0.07032	up
